# Supplementary material for: Oncogenic TRIM37 Links Chemoresistance and Metastatic Fate in Triple-Negative Breast Cancer
Source: Oxford University Press journal article supplement (doi:10.1158/0008-5472.can-20-1459), 2020-08-27
Supplement: 00085472can201459-sup-242465_2_supp_6500233_qf2chs.xlsx [file 00085472can201459-sup-242465_2_supp_6500233_qf2chs.xlsx]

## Sheet: Double Strand break
double-strand break repair (GO:0097551) gene	corelation with TRIM37 expression in no-TNBC	corelation with TRIM37 expression in normal tissue	corelation with TRIM37 expression in TNBC
RAD51C	0.62913	0.390583	0.587092
XRCC5	0.338637	0.713715	0.497524
RNF8	0.343471	0.543257	0.410116
ATP23	0.351575	-0.502072	0.369067
RNF168	0.333173	0.471397	0.361999
MRE11	0.197052	0.728018	0.351104
MCM9	0.199183	0.686112	0.344283
RAD51AP1	0.417091	0.741439	0.325068
PALB2	0.283785	0.772222	0.307041
SFR1	0.247555	0.314006	0.277792
DDX1	0.135773	-0.043154	0.274355
CHEK2	0.263056	0.634531	0.269854
RBBP8	0.0309366	0.717356	0.268546
BABAM1	0.326009	-0.249807	0.264224
RPA3	0.298258	0.249621	0.243632
RAD51	0.3241	0.498369	0.243612
GINS2	0.330998	0.528034	0.243257
MDC1	0.233107	0.686848	0.234599
RAD54B	0.34785	0.795006	0.230359
ERCC1	0.151162	0.238435	0.22702
FEN1	0.309311	0.526693	0.220765
KDM4D	0.0286995	0.442285	0.220399
UBE2V2	0.312434	0.183045	0.219206
TP53BP1	0.108576	0.771118	0.21902
SEM1	0.166621	-0.144542	0.217801
RAD51B	-0.0580346	0.427282	0.204673
PAXIP1	0.151055	0.761607	0.201626
SMARCAD1	0.170733	0.82729	0.200161
WDR48	0.151501	0.624123	0.191273
RECQL	0.181585	0.104907	0.188692
NSMCE2	0.261956	0.329122	0.188089
BABAM2	0.148039	NA	0.185135
RAD51D	0.212892	NA	0.176837
MLH1	0.184211	0.375555	0.171011
MORF4L1	0.134651	-0.15453	0.169066
EXD2	0.212588	0.682587	0.167082
SPIDR	0.22736	NA	0.165333
LIG3	0.0889101	0.702625	0.16438
TDP1	0.131744	0.800447	0.162043
UBE2N	0.198236	0.419622	0.157944
CDCA5	0.32925	0.484343	0.156371
MARF1	-0.0661767	NA	0.153329
CDC45	0.266652	0.490736	0.146444
HIST1H4A	0.0503905	-0.10856	0.134914
EXO1	0.285096	0.589862	0.122191
FANCB	0.179082	0.737438	0.119073
TRIP13	0.309384	0.675295	0.115005
PRKDC	0.162672	0.800115	0.106356
H2AFX	0.114725	0.231162	0.101634
EYA3	0.0938455	0.771703	0.0990201
RPA1	-0.0533866	0.579379	0.0922808
DCLRE1A	0.102214	0.854507	0.0864922
CDC7	0.180018	0.6307	0.0841615
APTX	-0.0291712	0.563962	0.0835059
RAD21	0.180072	0.607012	0.0809851
MSH2	0.0603152	0.824933	0.079868
HUS1	-0.00365261	0.536467	0.077398
C14ORF39	0.00667106	NA	0.0729281
VCP	0.217564	-0.0762768	0.0643283
MEIOB	0.0467557	NA	0.0619433
UVRAG	0.112869	-0.439744	0.0619265
PSMD14	0.242247	-0.00926329	0.0609328
EME1	0.260196	0.52735	0.060526
SUMO1	0.0201937	0.259458	0.0579717
BRCA1	0.174611	0.783972	0.0526914
RMI1	0.15499	0.821519	0.0512831
RIF1	0.0755874	0.691702	0.0447687
XRCC3	0.0745197	0.410631	0.0432777
BLM	0.193569	0.632914	0.0366386
WRN	-0.0628918	0.791097	0.0342542
HERC2	0.0115421	0.507319	0.0296186
AUNIP	0.155694	NA	0.0286371
ATM	-0.0256891	0.67639	0.0263533
SMC6	0.106142	0.639345	0.0257076
SWI5	0.0780831	NA	0.0256633
DMC1	0.0231538	0.543123	0.0248004
GINS4	0.150703	0.690808	0.0237922
HIST3H3	0.000142678	0.188849	0.0211759
HELQ	0.0570773	0.556135	0.0186688
ERCC4	0.125399	0.678702	0.0180945
TENT4A	0.0662772	NA	0.0154175
RFWD3	0.143975	0.824914	0.013255
NABP2	0.00798124	NA	0.0117894
MMS22L	0.133511	NA	0.0110864
HUS1B	0.101058	0.128797	0.00462936
CCDC155	-0.00642217	0.208282	0.00455452
RAD21L1	-0.0486612	0.191674	0.00340959
GGN	-0.053864	0.339267	0.00230347
POLA1	0.127612	0.782019	0.000481888
APBB1	0.0162501	0.130856	-0.0085561
XRCC6	0.0688023	0.38673	-0.00943407
BARD1	0.0764827	0.724174	-0.00955275
GEN1	0.0513445	0.712825	-0.0167664
NBN	-0.0173348	0.654508	-0.0174482
SPO11	-0.0622471	-0.063766	-0.0182492
NSD2	-0.00394555	NA	-0.0196893
ESCO2	0.0327637	0.583284	-0.0203034
EYA1	0.111054	-0.479496	-0.024352
RAD50	0.006071	0.736348	-0.0260506
TNKS1BP1	-0.141506	-0.0690396	-0.0261606
SFPQ	0.0158441	0.632788	-0.0306297
LIG4	-0.0118968	0.582011	-0.0307712
XRCC4	0.0254019	0.397696	-0.0369934
DNA2	-0.0434856	0.686452	-0.039459
MCMDC2	0.028208	NA	-0.0406384
ABRAXAS1	0.0389134	NA	-0.0491553
POLQ	0.165329	0.588057	-0.0499061
NSMCE1	0.0485252	0.0808297	-0.0522634
CYREN	-0.0595085	NA	-0.061126
PARP2	0.0281482	0.645696	-0.0658317
SMC5	-0.00704981	0.722147	-0.0662856
MUS81	-0.0572105	0.345409	-0.0724228
INO80	0.0774694	0.651378	-0.0729392
RNF138	0.014196	0.606966	-0.075436
XRCC1	-0.181762	0.280627	-0.0813786
PARP9	0.173847	0.458316	-0.0861866
TONSL	0.090633	NA	-0.0895566
MAD2L2	0.0844995	0.13169	-0.0895581
ZFYVE26	-0.0579986	0.467487	-0.0904742
MCM8	0.129269	0.708437	-0.0924853
PAXX	-0.0619012	NA	-0.0989029
EME2	-0.00909313	0.540631	-0.108039
NIPBL	-0.134788	0.740497	-0.113738
POLL	-0.156693	0.253157	-0.117265
TDP2	0.0219578	0.234591	-0.117323
BRCA2	-0.0640113	0.788576	-0.12332
ZBTB7A	-0.0575128	0.162032	-0.124585
RAD54L	0.0780505	0.52212	-0.125694
RECQL4	0.0607177	0.455137	-0.126589
SWSAP1	-0.0937839	NA	-0.135974
PIAS4	-0.233202	0.474031	-0.136537
YY1	-0.0425423	0.659359	-0.138391
AP5S1	0.0802651	NA	-0.146909
PRPF19	-0.196433	0.480643	-0.147538
ACTR5	0.0562431	0.524968	-0.160984
UIMC1	-0.0819456	0.450013	-0.162191
FBH1	-0.272489	NA	-0.16296
SETX	-0.10913	0.630999	-0.173645
MTA1	-0.236155	0.292752	-0.174132
RPA4	-0.126874	-0.227064	-0.179354
RPA2	-0.197459	0.317608	-0.186703
POLN	-0.19225	-0.124314	-0.189736
REC8	0.0043668	0.48053	-0.198879
KAT5	-0.104984	0.299435	-0.203717
NABP1	-0.107541	0.0853021	-0.211647
FAN1	-0.199894	0.45784	-0.215102
RECQL5	-0.0815488	0.462641	-0.217535
CIB1	-0.0817201	-0.00355204	-0.223913
PARP3	-0.194473	0.0830133	-0.225951
SLX1A	-0.103684	0.00145695	-0.280883
POLM	-0.187143	0.405143	-0.316248
NUCKS1	-0.281891	0.742451	-0.378404
AP5Z1	-0.155104	0.0215689	-0.384428

## Sheet: Cell Proliferation 
Cell Population Proliferation (GO:0008283) gene	corelation with TRIM37 expression in no-TNBC	corelation with TRIM37 expression in normal tissue	corelation with TRIM37 expression in TNBC
XRCC5	0.338635	0.713715	0.497526
DOCK7	0.336192	0.600167	0.456667
WDR47	0.35659	0.3725	0.455036
CTNNB1	0.181596	0.645302	0.412804
YME1L1	0.362653	0.794714	0.40158
CKS1B	0.406318	-0.0258804	0.39133
DISC1	0.30173	0.589341	0.387023
CHEK1	0.330568	0.664771	0.385731
HSPD1	0.429176	0.2655	0.381777
PPP1R8	0.281287	0.606084	0.381111
GNL3	0.306036	0.689245	0.37606
TXNRD1	0.455297	0.111552	0.361207
FIGNL1	0.346688	0.725086	0.360222
SMAD4	0.229763	0.628239	0.353047
MRE11	0.197051	0.728018	0.351101
SBDS	0.300811	-0.486235	0.350803
FAM83D	0.400233	0.639156	0.349917
THAP1	0.248917	0.43826	0.34883
STAT3	0.153708	0.577114	0.342755
EHF	0.0161994	0.648647	0.339387
SOX9	0.000542395	0.583865	0.335102
MYC	0.180668	0.25325	0.334278
LGR4	0.18186	0.388494	0.331929
SCRG1	-0.0869949	0.15481	0.307677
BOP1	0.264115	0.150706	0.307363
RACGAP1	0.402974	0.635091	0.301686
BTBD10	0.345413	0.591739	0.298392
ECD	0.273706	0.675365	0.297638
HPRT1	0.36425	0.454889	0.294643
PAFAH1B1	0.0893396	0.494079	0.291152
PAK5	0.0482302	NA	0.287871
NF2	0.15923	0.454233	0.275591
TGFB2	-0.0611545	0.417274	0.264717
TMEM14B	0.2346	-0.462189	0.264533
DIXDC1	-0.0593666	0.0560899	0.258956
PRDX2	0.238506	-0.3253	0.258949
ZNRF3	0.219121	0.594223	0.246023
NDRG4	0.0620676	-0.312589	0.235217
KANK1	-0.121584	-0.422393	0.230477
ERCC1	0.151163	0.238435	0.22702
KIT	-0.109158	0.476969	0.226317
CKS2	0.303733	0.519898	0.226306
NPPC	0.0554341	0.288042	0.226127
RYK	0.0749857	0.577667	0.225834
CTPS1	0.254261	NA	0.22544
NAA35	0.0500615	0.812314	0.223921
DLX5	-0.0538669	-0.114479	0.221758
MAP2K1	0.31972	-0.490116	0.220188
KIF14	0.284753	0.595109	0.218367
FZD3	0.0364348	0.727743	0.212145
E2F8	0.262704	0.0380917	0.196109
DMRT1	-0.044495	0.241492	0.195318
PSMG1	0.260245	0.193808	0.194381
KCNA1	-0.0190191	0.30094	0.193659
BCL2L2	0.128536	-0.366705	0.191704
RIPK2	0.227163	0.57877	0.190913
TRNP1	-0.123594	0.351535	0.184218
FGF2	-0.154308	-0.434324	0.18396
MCM7	0.0944745	0.434196	0.181558
EPHB1	-0.129462	0.445568	0.181499
GRHL2	0.230874	0.687321	0.179819
CDK1	0.358935	0.559543	0.178379
MELK	0.312107	0.567321	0.177842
TP53	0.120857	0.589769	0.176277
BMPR2	0.0620786	0.372324	0.175303
PAK1IP1	0.0754807	0.384406	0.173323
FOXC1	-0.226584	0.423751	0.173103
POLR3G	0.104311	0.633776	0.172048
MORF4L1	0.134651	-0.15453	0.169064
SOX4	0.0119789	0.712429	0.167143
PRDX1	0.270682	0.172842	0.165829
BAD	0.138488	-0.230686	0.164931
BYSL	0.194238	0.45137	0.163911
PELO	0.257272	0.125551	0.161757
CD151	0.0436141	-0.433482	0.160935
YJEFN3	-0.0185311	0.281304	0.158139
NKX2.5	0.0498094	NA	0.155412
FZD9	-0.0918198	-0.44162	0.152982
FAM83B	0.113971	0.720636	0.151867
YPEL5	0.162756	-0.073964	0.150737
CADM1	-0.148399	0.575713	0.14893
LARP1	0.230444	0.2395	0.147166
IHH	0.0143707	-0.0138023	0.141851
AXIN2	0.148521	0.223514	0.140043
CCN2	-0.0285975	NA	0.139276
UCHL1	0.0994884	-0.375632	0.13824
FGF13	-0.18159	-0.29825	0.134929
FKBP1B	0.0935881	0.0861068	0.130191
SHH	0.0188523	-0.0883445	0.127016
ID4	-0.127171	0.358031	0.123664
CLU	-0.102741	-0.0335485	0.123041
ASCL1	0.156051	0.0769533	0.121655
PAX1	0.000651081	0.135902	0.120951
FGFR1	0.165848	-0.301364	0.120057
PTGES3	0.158716	0.488141	0.118417
IRF6	-0.0182155	0.675543	0.118014
YTHDF2	0.118655	0.676099	0.116598
RRM1	0.112479	0.520445	0.115979
PTCH1	-0.120821	0.417748	0.11575
PSEN1	0.192317	0.587133	0.114978
RNF43	0.313803	0.637573	0.113543
CDC25C	0.25113	0.458591	0.113514
AURKB	0.246931	0.408186	0.112665
SIX3	0.0408915	0.0336037	0.110881
LGR5	-0.00630222	0.0856139	0.109206
EPM2A	0.0313602	-0.388754	0.105788
DAGLA	0.171231	0.516054	0.103287
NRG1	-0.0463451	0.456392	0.103062
CDK5RAP3	-0.0279354	0.367012	0.102296
DPH1	0.0657194	0.452584	0.102007
MYH10	-0.125169	-0.112812	0.100094
BUB1	0.283264	0.585375	0.099888
FGFR2	0.0131966	0.6344	0.0972265
IFNK	0.00743202	-0.0157529	0.0971718
SMAD1	0.164111	0.488432	0.0969449
NPR3	-0.0288891	-0.326676	0.0961322
FERMT1	-0.0106555	0.625527	0.0947791
NOTCH2	-0.0426349	0.263817	0.0938444
ENPEP	0.0462919	-0.267469	0.0919495
STC1	0.115461	0.0958724	0.0900434
ZPR1	0.117159	NA	0.0895426
RAB10	0.119491	0.498539	0.0878571
ITPKB	-0.247448	-0.160242	0.0877967
HELLS	0.223256	0.783106	0.0855974
WNT3	0.0328006	0.519014	0.0855658
DVL2	-0.0676873	0.498921	0.0825446
IFNA1	-0.0142421	0.115574	0.0821003
H3F3B	0.0764673	0.478301	0.0778411
YAP1	-0.173948	0.22773	0.0759573
UNCX	0.0178263	-0.0953992	0.0741795
LRP6	-0.0973411	0.704686	0.0738581
MMP16	-0.0143598	0.47635	0.073817
KIF1A	0.0538192	0.124453	0.073446
VEGFD	-0.113375	NA	0.0729758
CDH13	-0.00362093	-0.331434	0.0724099
ORC3	0.0422876	NA	0.0721784
ANGPT4	0.0153067	-0.312223	0.0672982
ATAD5	0.0823561	0.802288	0.0656909
POU3F2	0.0402722	-0.0740015	0.0653932
ARID2	0.0835166	0.795153	0.0648729
TNFSF18	0.0418831	0.28656	0.062763
EGR1	-0.11916	-0.0483222	0.0614236
FER	0.0594363	0.369546	0.0599132
TGFBR3	-0.231571	-0.160685	0.0591823
GSTP1	-0.274607	-0.0447328	0.0588394
FZD6	0.11038	0.831892	0.0579635
IL12B	0.0143451	0.300905	0.0578565
MEGF10	-0.0113411	0.377224	0.0566002
PENK	-0.0936782	0.239802	0.0541401
DCT	-0.0830141	0.0607925	0.0535798
RORA	0.0540003	0.317843	0.0529857
CDC25A	0.201818	0.587823	0.05291
PITX2	-0.0417834	-0.217531	0.0520086
ZG16B	0.049946	0.376005	0.0517614
RAC1	0.129079	0.0557819	0.0509412
GINS1	0.00993058	0.770733	0.049389
RHBDF1	-0.0743131	0.544969	0.0485514
USP13	0.0128752	-0.165842	0.0478296
FGFR3	0.108288	0.337423	0.0473053
CSPG4	-0.191922	-0.588767	0.0468454
TGFA	0.0194025	0.447105	0.0461773
LIPA	0.214679	-0.219767	0.0460552
CUL1	-0.0212124	0.442755	0.0458387
DLG1	0.0532755	0.401615	0.0448843
NOX5	0.05885	0.278917	0.0439653
NOTCH1	-0.18446	-0.158267	0.0436772
FABP7	-0.0656929	0.298017	0.0436191
NDEL1	-0.144002	0.26319	0.0430922
BCL2	0.0215488	0.350751	0.0410236
ARTN	-0.00194619	0.332684	0.0409127
GPC3	-0.0513513	-0.534754	0.0395089
OCA2	-0.0592931	0.307837	0.0391163
BMP7	-0.0135376	0.224962	0.0386804
WNT7A	0.00822136	0.100216	0.0364616
CEMP1	-0.0182761	0.0235167	0.0364027
SART3	0.141857	0.605818	0.034914
CYP1A1	-0.0167866	-0.0344509	0.0335151
CITED2	0.0458996	-0.241969	0.0334895
FGF7	-0.070523	0.069489	0.0334368
TGFB1	-0.00307023	-0.221538	0.0327589
YY1AP1	0.016581	0.638313	0.0324602
WNT5A	-0.0947458	0.442395	0.0323017
EIF2S2	0.164062	0.100009	0.0317784
IFNA7	-0.0161705	0.0239104	0.0304363
CX3CL1	-0.160141	0.435083	0.0292724
BTRC	-0.0396527	0.739745	0.0278244
PCM1	-0.116481	0.671636	0.0271554
GNG2	-0.0600555	-0.438382	0.0251636
APOA1	-0.00407747	-0.073996	0.0245288
GINS4	0.150704	0.690808	0.0237937
GBX2	0.02782	-0.0341139	0.0237273
KLK8	-0.0665217	0.290064	0.0190832
POU3F3	-0.0274523	0.283872	0.0190503
ACE	0.0902485	-0.34588	0.0185971
WNT2B	0.0826017	-0.0700522	0.0183538
ID2	0.054732	0.217842	0.0157385
ANXA7	0.127113	0.00975148	0.0149701
MTSS1	0.0981216	-0.0134731	0.0138109
FGF4	-0.0176593	-0.106773	0.0134398
IFNW1	0.00148176	0.249667	0.0130032
MKI67	0.188495	0.44548	0.0109965
SOX5	0.0341399	-0.435303	0.0104347
CEBPB	0.0247893	-0.455435	0.0102014
BMP2	-0.113494	-0.355889	0.0101974
LHX5	-0.0397466	0.0902471	0.0100119
TRIM71	0.0141781	0.167005	0.00882634
TBX1	0.132549	0.102475	0.00698325
ESRRB	-0.010305	0.199653	0.00629092
CCND1	0.0508348	0.403912	0.00481119
FGF8	-0.0462662	-0.246167	0.00443164
USPL1	-0.0170956	0.561947	0.0038992
IMPDH2	-0.0277449	0.33218	0.00255962
LRP2	-0.0433563	0.57152	0.00198543
ITGB1BP1	-0.0437488	-0.588301	0.00182628
EEF2	-0.203124	0.160146	0.000786386
JUNB	-0.0651968	-0.218159	-0.000335239
PES1	0.0211999	0.250789	-0.000788362
HAND2	-0.0860625	-0.109314	-0.0014494
IL12A	-0.0677768	0.588442	-0.00213333
TACC1	-0.0613243	-0.446984	-0.00214036
RC3H2	0.190405	0.445925	-0.00226928
SOX11	0.00112962	0.430992	-0.00357785
KIF3A	0.0184806	0.776785	-0.00503415
IFNB1	0.0984017	-0.0130822	-0.00575064
PDS5B	-0.144522	0.764498	-0.00602197
CDK3	0.00972907	0.224923	-0.00604436
MS4A1	-0.09925	0.19042	-0.00708888
ETV6	-0.366154	0.613417	-0.00800361
TGFBR2	-0.0325555	-0.353173	-0.00878065
PROK2	-0.0292054	-0.0612928	-0.00982312
CRTAM	-0.0377428	0.420725	-0.00985616
LTK	0.0562902	0.180294	-0.00999708
BAX	0.0203133	0.213385	-0.01053
PURB	0.0493061	0.764863	-0.0132222
PTPRC	0.027386	0.333513	-0.0132258
NUMBL	-0.0314863	-0.452651	-0.0133391
ARHGEF2	-0.331146	-0.223934	-0.0133787
NKX6.1	0.0137774	NA	-0.0134699
ALKBH3	-0.0649876	0.264542	-0.0143806
SNW1	0.0708659	0.473	-0.0152381
IFNA21	0.00251088	0.221288	-0.01619
NBN	-0.0173346	0.654508	-0.0174481
FAP	0.00228839	-0.123264	-0.0189074
DAZAP1	-0.0714694	0.182834	-0.0192943
TEK	-0.111663	-0.45754	-0.0194996
XBP1	0.250642	0.539194	-0.0215488
FOXC2	-0.184713	0.113244	-0.0216397
SIX2	-0.0420524	-0.469069	-0.0239123
LOXL2	0.0194455	-0.340066	-0.0240981
LHX9	-0.00511651	0.0159512	-0.0249396
ZEB2	-0.0285374	-0.445259	-0.0257079
IL5RA	-0.0448862	-0.0505704	-0.0260592
SATB1	-0.0209631	0.281066	-0.026935
CSF1	0.0293848	-0.196006	-0.0272975
HGF	-0.0429816	0.344218	-0.0285118
RASGRF1	0.0273702	0.258095	-0.028637
TBX20	0.0280329	0.176777	-0.0287889
GNAT1	-0.0269211	0.272438	-0.0289004
TBK1	0.165677	0.716044	-0.0289973
RASGRP1	-0.0368239	0.699986	-0.0298274
LIG4	-0.0118993	0.582011	-0.0307724
WNT3A	0.0197254	0.0880492	-0.0311115
CEACAM1	-0.107011	0.684045	-0.0314645
HTR1A	0.00859766	0.230542	-0.0316291
TNFSF11	-0.0485145	-0.0185067	-0.0326596
SFRP2	-0.0673157	0.0874985	-0.0337637
IFNA5	-0.0177732	0.169828	-0.0337825
EMP2	-0.0755676	0.275002	-0.0338939
EMX2	-0.131571	-0.561471	-0.0344916
EML1	0.0224759	-0.424813	-0.0345898
HOXB4	-0.0532909	-0.0936123	-0.0347647
IFNA2	-0.0177626	-0.118714	-0.0348323
UBE2L3	-0.0401351	-0.334216	-0.035027
IFNA6	-0.00234214	0.0766896	-0.035416
FPGS	-0.0242676	-0.350569	-0.0357407
KRT2	-0.0232109	0.169089	-0.0377635
EPHA2	-0.0952008	0.378069	-0.0381916
FSHR	-0.000557453	0.126686	-0.0391995
BMP10	-0.0133196	0.139758	-0.0392483
LMBR1L	0.000955841	0.293312	-0.0394559
IGFBP5	-0.0196869	-0.313667	-0.0395618
FSHB	-0.0258906	-0.00169583	-0.0405661
CER1	-0.0241956	0.0119399	-0.0423977
DBN1	-0.161985	-0.26661	-0.0433071
TNF	-0.0317787	0.1999	-0.0438066
WNT1	-0.0643344	-0.145564	-0.0443419
RAG2	-0.0579274	0.232944	-0.0462867
RC3H1	-0.032772	0.453253	-0.0472927
IGF2	-0.179519	-0.173001	-0.0474846
FGF10	-0.0232507	-0.14297	-0.0502281
COPS2	-0.0036388	0.123965	-0.050435
IFNA14	-0.0159367	-0.0418579	-0.0508033
ABCB1	-0.107826	0.53768	-0.0529724
DACH1	-0.00684397	0.521051	-0.053357
TYR	-0.012044	0.0225877	-0.0548128
IL33	-0.146176	0.134928	-0.0556507
SEMA5A	-0.0998209	0.65646	-0.056778
PURA	-0.0357361	0.509387	-0.0590755
IFT80	-0.0319834	0.816268	-0.0594882
SCRIB	0.00647076	0.34244	-0.0595011
WNT10B	0.0130259	-0.376048	-0.0606841
RRN3	0.0820967	0.472708	-0.0616415
FRS2	0.0304263	0.649178	-0.0624962
WNT7B	0.000667442	0.465536	-0.0629399
CR2	-0.100806	0.211553	-0.0653771
IFNA10	0.0142581	NA	-0.0677103
NEUROD4	0.0215422	-0.0287621	-0.0678249
NES	-0.125431	0.279826	-0.0694571
THPO	-0.0684915	-0.386227	-0.0697122
KAT2A	-0.0825203	0.467918	-0.0702068
MUS81	-0.0572094	0.345409	-0.0724207
FST	-0.184235	0.0612046	-0.073995
IMPDH1	0.0520251	-0.483206	-0.074777
FLT3	0.0150068	0.357382	-0.0765133
EDNRA	-0.180373	0.231928	-0.0783848
ERN1	0.0636657	0.648504	-0.080577
CD74	0.02635	0.0512531	-0.0814135
AGT	-0.0388228	-0.3424	-0.0825226
PRKAR1A	0.084441	0.307588	-0.0839599
DDX41	0.0235957	0.2721	-0.0841738
AZI2	0.0227383	-0.271797	-0.0855321
GLUL	-0.0541548	-0.456992	-0.0884639
IL7R	-0.0255811	0.436525	-0.0911151
HNF1B	-0.00460013	0.215568	-0.0928226
ZNF324	-0.226857	0.5293	-0.0952731
ARIH2	-0.113235	0.343616	-0.0959082
BMP4	-0.213306	-0.173687	-0.096439
P2RX7	-0.0287273	0.660128	-0.0968452
HMGA2	-0.0474174	0.255313	-0.0973088
MEF2C	-0.286329	-0.20436	-0.0973805
LIPG	-0.108505	0.475847	-0.0974086
RPGRIP1	0.00788394	0.352598	-0.0976785
PRKX	-0.0950862	0.730457	-0.0980504
FGL1	-0.0364214	0.141761	-0.0993131
FBXO4	0.135721	0.458179	-0.100975
ATOH8	-0.196379	-0.536776	-0.102686
TP63	-0.121756	0.553586	-0.103182
TWIST1	0.0124654	-0.537698	-0.104395
PPP3CB	-0.10845	-0.40202	-0.105695
TEAD3	-0.10877	0.439573	-0.110261
CD34	-0.171567	-0.451763	-0.110805
WNT2	0.0415803	-0.0526597	-0.113494
IGF2BP1	-0.0327542	0.0305431	-0.113505
DCHS2	-0.0147096	0.577295	-0.114395
SRC	0.0359126	0.519759	-0.118025
IRF2	0.0752851	0.510984	-0.118421
MAPK1	-0.145475	0.676032	-0.119008
CALCA	-0.0180556	-0.0221772	-0.122352
DCHS1	-0.196272	0.0563392	-0.123024
BRCA2	-0.0640123	0.788575	-0.123319
GNB1	0.0396542	0.331884	-0.124023
F2RL1	-0.100182	0.614951	-0.125657
ESR1	0.0937145	0.377124	-0.125802
SERPINB1	0.183426	0.0933718	-0.127075
ACVR2A	-0.151666	0.616133	-0.129597
TACC2	-0.234929	-0.233626	-0.13193
HHIP	-0.0145033	-0.494852	-0.133056
IGFBP3	-0.17351	-0.336104	-0.134627
ARX	0.0351462	-0.0407202	-0.13505
TGFBI	-0.0667873	-0.216381	-0.139999
MECOM	-0.170517	-0.256259	-0.141741
IFNA4	-0.0269859	0.122069	-0.142766
ABL1	-0.185566	0.133568	-0.14326
GLI3	-0.0761159	0.577244	-0.14628
PRPF19	-0.196434	0.480644	-0.147539
EPHB6	-0.207628	0.0349497	-0.147878
COL8A1	-0.167295	-0.400277	-0.150226
ZNF503	-0.209324	-0.329039	-0.151185
RUNX1	-0.275927	0.64782	-0.152115
COL8A2	-0.124135	0.367267	-0.152677
CD40LG	-0.122131	0.296288	-0.153926
LEF1	-0.0586708	0.527943	-0.154593
ZFP36L1	-0.220134	0.231926	-0.155828
COMP	-0.129739	-0.216351	-0.160447
CCND3	-0.238142	0.204613	-0.160591
PDGFRB	-0.180651	-0.318803	-0.161133
IL15	-0.0767416	0.109446	-0.161206
SH2D2A	0.0098999	0.345099	-0.162055
RERE	-0.116288	0.2511	-0.162569
IFNA8	-0.219485	0.286387	-0.162683
IL10	-0.0271221	-0.12482	-0.164093
HMOX1	-0.0299324	-0.170323	-0.164927
IGF1	-0.172625	-0.248725	-0.165638
CD180	-0.0519238	0.284877	-0.166668
SDCBP2	-0.0469231	-0.0134081	-0.171625
NAA60	-0.0240856	NA	-0.172212
TARBP2	-0.086746	0.423247	-0.175305
ATF5	-0.0505768	-0.0993026	-0.178945
LEPR	-0.245777	-0.0802854	-0.178949
FYN	-0.173711	-0.461702	-0.179151
CD19	-0.0986113	0.181468	-0.180271
NDE1	-0.056543	0.614667	-0.182906
GPX1	0.00973576	-0.529814	-0.183416
NUMB	-0.25687	0.579099	-0.187615
LRP1	-0.130661	-0.499317	-0.189205
WNT4	0.0279258	0.182185	-0.19029
DDR2	-0.294089	-0.400381	-0.198791
BRAT1	-0.0666449	NA	-0.199791
ERCC2	-0.25294	0.364173	-0.201415
BCL2L1	0.0142342	0.332495	-0.202329
IL23A	-0.0620766	0.4531	-0.204483
CSF1R	-0.193886	-0.249133	-0.206915
PLXNB2	-0.177016	0.492666	-0.213813
MMP14	-0.0297784	0.170273	-0.214203
TACC3	0.0392865	0.225171	-0.21509
WNT16	-0.0618236	0.0447947	-0.215445
CDK9	-0.173893	0.120749	-0.216896
CBFA2T2	-0.109288	0.722704	-0.220574
CD79A	-0.110212	0.224477	-0.220626
IGFBP4	-0.153633	0.105101	-0.223352
STAT6	-0.199399	0.149442	-0.228328
MED1	0.00805661	0.813198	-0.229391
SALL4	-0.111832	0.234271	-0.23027
CD40	-0.0732905	-0.332113	-0.230421
MSN	-0.198356	-0.247189	-0.23343
AKT1	-0.140376	0.028577	-0.234
CD70	-0.102636	-0.349748	-0.234285
CTC1	-0.262059	NA	-0.235181
TNFSF14	-0.181171	0.489267	-0.243219
TREM2	-0.0983089	-0.0867689	-0.250058
GNAI2	-0.15135	-0.387583	-0.250158
PRKCD	0.113677	-0.44895	-0.252686
PLCL2	-0.230044	-0.418659	-0.25517
STAT1	0.0263877	0.293226	-0.255813
RXRA	-0.206208	-0.584829	-0.264379
RAP1B	-0.120495	-0.137756	-0.267711
BAK1	-0.107522	0.265626	-0.273171
TNFRSF4	-0.0837558	-0.0874187	-0.278876
ELF4	-0.02496	0.0902927	-0.279293
CARD11	-0.292303	0.361654	-0.280941
IL18RAP	-0.0818062	0.312527	-0.281813
ACVRL1	-0.27542	-0.463995	-0.282207
MAP4K1	-0.136093	0.283972	-0.286634
PDK1	-0.167952	-0.0661858	-0.287742
BTN3A1	-0.124986	0.479958	-0.297536
PPARD	-0.210237	0.433562	-0.308463
PSMB10	-0.158275	0.0129781	-0.315782
PRDM1	-0.113954	0.354148	-0.337768
RPS6KA1	-0.329293	0.438682	-0.344555
TCIRG1	-0.220073	-0.116165	-0.380162
PTK2B	-0.284962	0.410759	-0.380961
